# Supplementary material
Source: PubMed Central journal article supplement (PMC3104677)
Supplement: NIHMS292628-supplement-Supp.pdf [file NIHMS292628-supplement-Supp.pdf]

**Supporting information for Lie et al., “Overlapping repressor binding sites regulate expression of the *Methanococcus maripaludis* *glnK*<sub>1</sub> operon”**

Fig. S1

Fig. S2

Fig. S3

Fig. S4

Table S1

Table S2

References

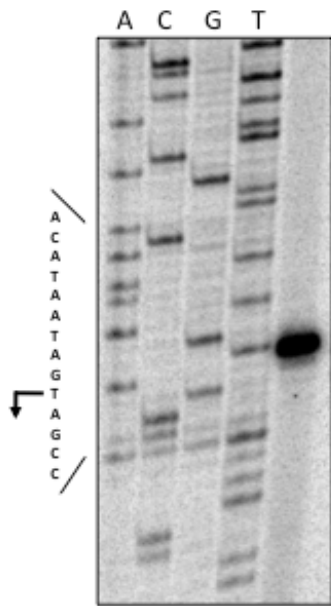

Fig. S1. Primer extension analysis of the *glnK<sub>1</sub>* mRNA

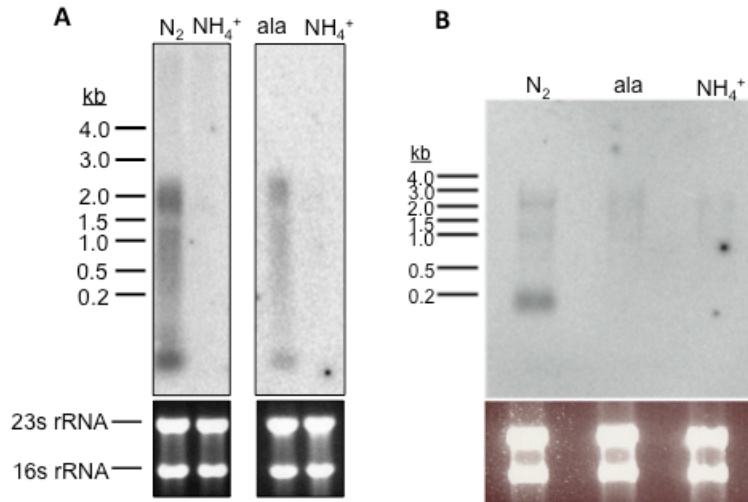

**Fig. S2. Northern blots of *glnK1* mRNA**

A. RNA from batch cultures of Mm900 grown with  $N_2$  or ammonia, and alanine or ammonia, are compared in two separate hybridizations.

B. RNA was extracted from  $H_2$ -limited chemostat cultures (Haydock et al., 2004) grown on three different nitrogen sources. Ethidium bromide-stained rRNA bands show equal loading.

Sizes of RNA standards are shown.

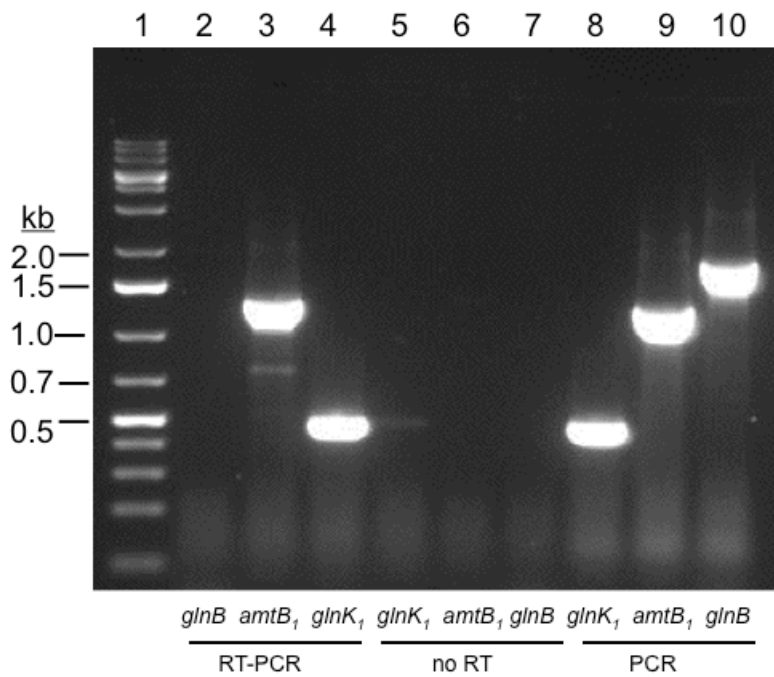

**Fig. S3. Reverse transcription analysis of *glnK*<sub>1</sub> mRNA**

PCR and RT-PCR reactions were performed using a forward primer in the upstream untranslated region and reverse primers in each coding region (indicated below the figure). The location of each primer is mapped in Fig. 2. RNA (1 µg per reaction) was used for RT-PCR (lanes 2-4) or PCR without RT (lanes 5-7). Genomic DNA (4 µg per reaction) was used for PCR (lanes 8-10).

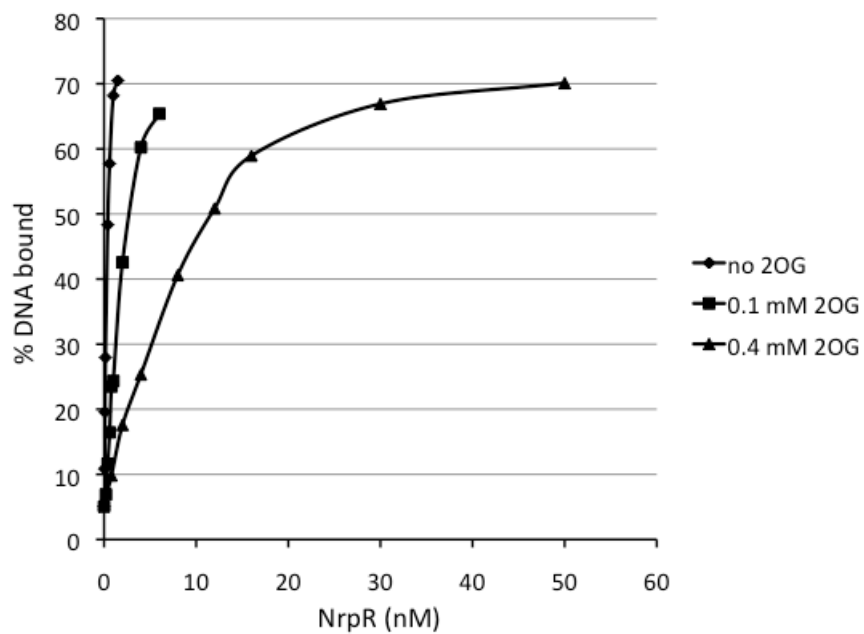

**Fig. S4. NrpR binding to *glnK<sub>1</sub>* operator DNA with varying 2OG**

Plots are derived from EMSA experiments. DNA probes contained *glnK<sub>1</sub>* O<sub>1</sub> + O<sub>2</sub> as in Fig. 3. K<sub>d</sub> values were estimated as the NrpR concentrations at half-maximal percent shifts.

Table S1. Strains and plasmids

| Strain or plasmid                                      | Features                                                                                                                                      | Reference                           |
|--------------------------------------------------------|-----------------------------------------------------------------------------------------------------------------------------------------------|-------------------------------------|
| <b>Strains</b>                                         |                                                                                                                                               |                                     |
| S2                                                     | Wild type <i>M. maripaludis</i>                                                                                                               | (Whitman <i>et al.</i> , 1986)      |
| Mm900                                                  | S2 $\Delta$ hpt                                                                                                                               | (Moore & Leigh, 2005)               |
| Mm1127                                                 | Mm900 $\Delta$ upt::P <sub>glnK1</sub> -lacZ                                                                                                  | This study                          |
| Mm1213                                                 | Mm900 $\Delta$ upt::P <sub>glnK1ct1ag1</sub> -lacZ <sup>a</sup>                                                                               | This study                          |
| Mm1128                                                 | Mm900 $\Delta$ upt::P <sub>glnK1ct2ag2</sub> -lacZ <sup>a</sup>                                                                               | This study                          |
| Mm1164                                                 | Mm900 $\Delta$ upt::P <sub>glnK1ct1ag1ct2ag2</sub> -lacZ <sup>a</sup>                                                                         | This study                          |
| Mm1198                                                 | Mm1127 $\Delta$ nrpR                                                                                                                          | This study                          |
| <b>Plasmids</b>                                        |                                                                                                                                               |                                     |
| pCR2.1 <sup>®</sup> -TOPO                              | Amp <sup>r</sup> Kan <sup>r</sup> Cloning vector                                                                                              | Invitrogen                          |
| pWLG40+lacZ                                            | Amp <sup>r</sup> Pur <sup>r</sup> Replicative vector for <i>M. maripaludis</i> , contains P <sub>hmvA</sub> of <i>M. voltae</i> fused to lacZ | (Gardner & Whitman, 1999)           |
| pWLG40K <sub>1</sub>                                   | Amp <sup>r</sup> Pur <sup>r</sup> pWLG40 where P <sub>hmvA</sub> is replaced by P <sub>glnK</sub>                                             | This study                          |
| pWLG40glnK <sub>1</sub> O <sub>1</sub>                 | Amp <sup>r</sup> Pur <sup>r</sup> pWLG40 where P <sub>hmvA</sub> is replaced by P <sub>glnKct1ag1</sub> <sup>a</sup>                          | This study                          |
| pWLG40glnK <sub>1</sub> O <sub>2</sub>                 | Amp <sup>r</sup> Pur <sup>r</sup> pWLG40 where P <sub>hmvA</sub> is replaced by P <sub>glnKct2ag2</sub> <sup>a</sup>                          | This study                          |
| pWLG40glnK <sub>1</sub> O <sub>1</sub> +O <sub>2</sub> | Amp <sup>r</sup> Pur <sup>r</sup> pWLG40 where P <sub>hmvA</sub> is replaced by P <sub>glnKct1ag1ct2ag2</sub> <sup>a</sup>                    | This study                          |
| pBLPrt                                                 | Amp <sup>r</sup> Kan <sup>r</sup> Neo <sup>r</sup> vector for markerless integration by replacing the upt gene                                | (Moore & Leigh, 2005)               |
| pBLPrtglnK <sub>1</sub>                                | pBLPrt with P <sub>glnK1</sub> -lacZ                                                                                                          | This study                          |
| pBLPrtglnK <sub>1</sub> O <sub>1</sub>                 | pBLPrt with P <sub>glnK1ct1ag1</sub> -lacZ <sup>a</sup>                                                                                       | This study                          |
| pBLPrtglnK <sub>1</sub> O <sub>2</sub>                 | pBLPrt with P <sub>glnK1ct2ag2</sub> -lacZ <sup>a</sup>                                                                                       | This study                          |
| pBLPrtglnK <sub>1</sub> O <sub>1</sub> +O <sub>2</sub> | pBLPrt with P <sub>glnK1ct1ag1ct2ag2</sub> -lacZ <sup>a</sup>                                                                                 | This study                          |
| pCRPrtNeo                                              | vector for markerless gene replacement                                                                                                        | (Moore & Leigh, 2005)               |
| pCRPrtNeo $\Delta$ nrp                                 | pCRPrtNeo with in frame deletion of the nrpR gene                                                                                             | (Lie <i>et al.</i> , 2007)          |
| pMmp1.1                                                | pGEM containing <i>M. maripaludis</i> nif promoter                                                                                            | (Cohen-Kupiec <i>et al.</i> , 1997) |
| pCR2.1glnK <sub>1</sub> pro                            | pCR2.1 <sup>®</sup> -TOPO containing <i>M. maripaludis</i> glnK <sub>1</sub> promoter                                                         | This study                          |

<sup>a</sup>The mutations in O<sub>1</sub> and O<sub>2</sub> are designated ct1ag1 and ct2ag2 respectively.

Table S2. Primers

| Primer       | Sequence (5'-3')                                         | Restriction site |
|--------------|----------------------------------------------------------|------------------|
| PglnK1fw     | ATACTAGTGTGGGTACCATGGTTGTAAGAG                           | SpeI             |
| PglnKrv      | TATAATGCATACACCCCTTCGTGTCTTTG                            | NsiI             |
| PglnKAscI fw | TATAGGCGCGCCGTGGGTACCATGGTTGTAAGAG                       | AscI             |
| LacZAscIrv   | TATAGGCGCGCCGCCCGGTTATTATTATTTTGGACAC                    | AscI             |
| deltaO1rv    | TCGGAAGGAACCCCTTTTCCTTAAGGGATGATAATACATTGAC              |                  |
| deltaO2rv    | GCGTCTCGGAACCTTCCGGAAAAGGTTTCCGATGATAATAC                |                  |
| deltaO1/O2rv | GGTGCCTCTCGGAACCTTCCCTTAAGGTTAAGGGATGATAATA<br>CATTG     |                  |
| utrlnK1fw    | AAACCAAATAACCGACATTACC                                   |                  |
| utrlnK1rv    | ACACCCCTTCGTGTCTTTG                                      |                  |
| Exglnk1a     | GGCTATTTTAAGGTTAATGG                                     |                  |
| P7           | GCTCTAGATTTGGTTGGTGCGTCTCGG                              |                  |
| P8           | GCTCTAGATAAGTCAATGTATTATCATCGGAAAAGG                     |                  |
| P9           | GCTCTAGATAAGTCAATGTATTATCATCCCTTAAGGAAAAGGGG             |                  |
| P13          | GCTCTAGATTTGGTTGGTGCGTCTCGGAAGGAACCCCTTTTCC              |                  |
| P10          | GCTCTAGATAAGTCAATGTATTATCATCGGAAAACCTTTTCCGG<br>AAGGTTCC |                  |
| P12          | GCTCTAGATTTGGTTGGTGCGTCTCGGAACCTTCCGGAAAAGG              |                  |
| P11          | GCTCTAGATAAGTCAATGTATTATCATCCCTTAACCTTAAGGGG             |                  |
| P14          | GCTCTAGATTTGGTTGGTGCGTCTCGGAACCTTCCCTTAAGG               |                  |
| LfRepKO1     | ATTATCTAGAAAAGCAATTCGCTGAACAATGC                         |                  |
| RtRepKO1     | ATATACTCGAGCTTTTACAACGAAATTTCC                           |                  |
| Mmniffor1    | TTTAGTTTTTATGGGACTATTATCG                                |                  |
| Mmnifrev     | GCATTAGGCCTCTATATATTGTTGTC                               |                  |
| FpglnKF      | ATCTATTTATTGGTCTATTTGG                                   |                  |
| FpglnKrev2   | GGTTAATGGTGCGATATAGTGATTTGG                              |                  |
| FpglnKRNotI  | TAAGCGGCCGCTTGGCTATTTTAAGGTTAATGG                        |                  |
| FpglnkFNotI  | TAAGCGGCCGCATCTATTTATTGGTCTATTTGG                        |                  |
| Glnkufr      | AAACCAAATAACCGACATTACC                                   |                  |
| Glnk1rtr     | TTATGCCTGATTGCCTG                                        |                  |
| Amtbrtr      | GCGAGAAGTGCTCCAAT                                        |                  |
| Glnbrtr      | CCGTCTCCAGGTTTTCC                                        |                  |

## References

- Cohen-Kupiec, R., C. Blank & J. A. Leigh, (1997) Transcriptional regulation in Archaea: in vivo demonstration of a repressor binding site in a methanogen. *Proc Natl Acad Sci USA* **94**: 1316-1320.
- Gardner, W. L. & W. B. Whitman, (1999) Expression vectors for *Methanococcus maripaludis*: overexpression of acetohydroxyacid synthase and beta-galactosidase. *Genetics* **152**: 1439-1447.
- Haydock, A. K., I. Porat, W. B. Whitman & J. A. Leigh, (2004) Continuous culture of *Methanococcus maripaludis* under defined nutrient conditions. *FEMS Microbiol Lett* **238**: 85-91.
- Lie, T. J., J. A. Dodsworth, D. C. Nickle & J. A. Leigh, (2007) Diverse homologues of the archaeal repressor NrpR function similarly in nitrogen regulation. *FEMS Microbiol Lett* **271**: 281-288.
- Moore, B. C. & J. A. Leigh, (2005) Markerless mutagenesis in *Methanococcus maripaludis* demonstrates roles for alanine dehydrogenase, alanine racemase, and alanine permease. *J Bacteriol* **187**: 972-979.
- Whitman, W. B., J. Shieh, S. Sohn, D. S. Caras & U. Premachandran, (1986) Isolation and characterization of 22 mesophilic methanococci. *System. Appl. Microbiol.* **7**: 235-240.
